# Supplementary material for: Adherence in children using positive airway pressure therapy: a big-data analysis
Source: PubMed Central journal article supplement — Lancet Digit Health. Author manuscript; Available in PMC 2021 Jan 30. (PMC7847310; doi:10.1016/s2589-7500(19)30214-6), 2019-12-23

## ONLINE SUPPLEMENT

### Adherence in children using positive airway pressure therapy: a big data analysis

Rakesh Bhattacharjee, Adam Benjafield, Jeff Armitstead, Peter A. Cistulli, Carlos Nunez, Jean-Louis Pepin, Holger Woehrle, Yang Yan, Atul Malhotra

**Supplementary Figure 1:** Geographic variation in proportion of paediatric patients meeting Centers for Medicare & Medicaid Services adherence criteria during use of positive airway pressure (PAP)

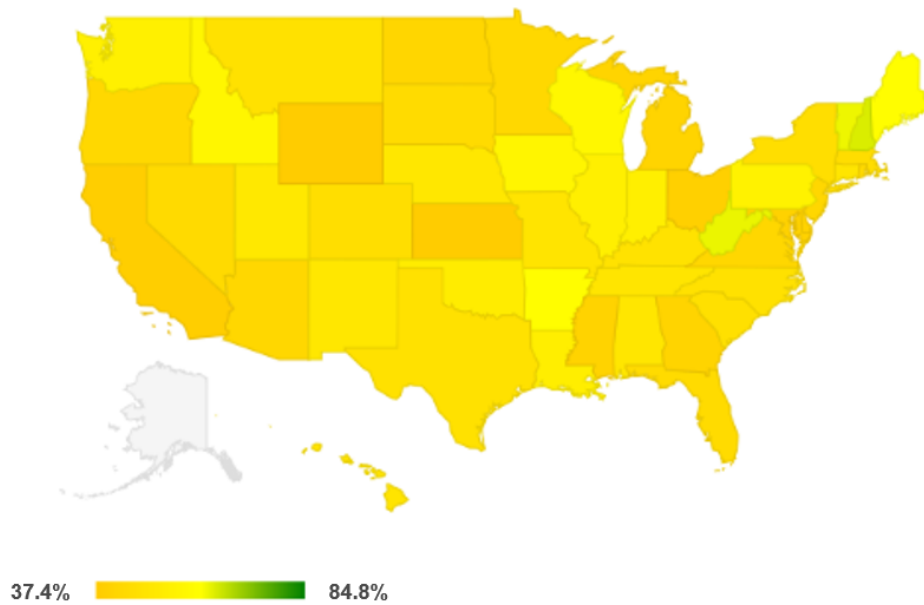

**Supplementary Figure 2:** Influence of (A) residual apnoea-hypopnoea index (rAHI), (B) 95<sup>th</sup> percentile pressure, and (C) median mask leak, on usage of positive airway pressure (PAP).

**A**

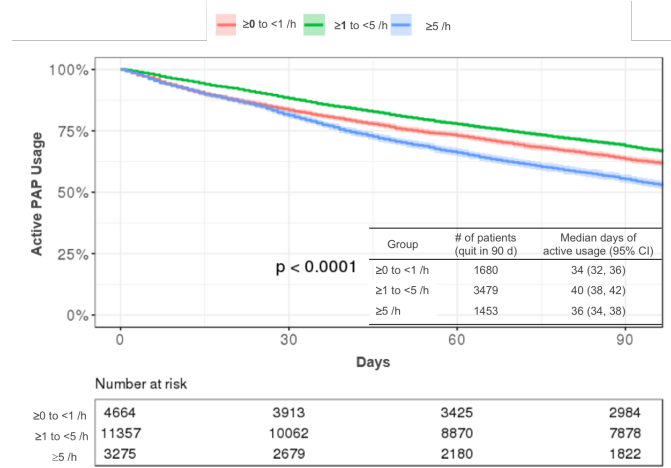

**B**

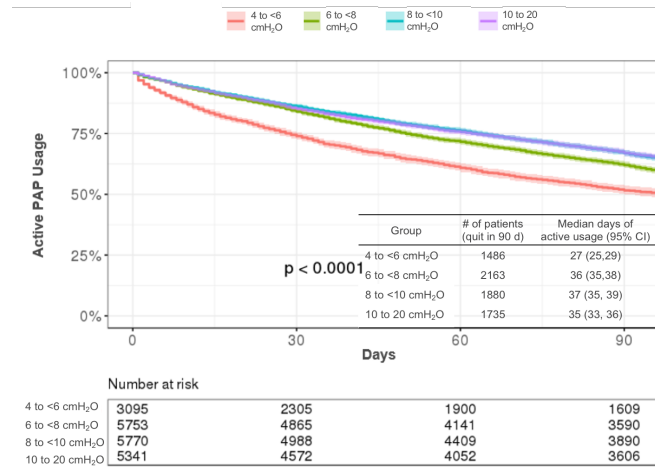

**C**

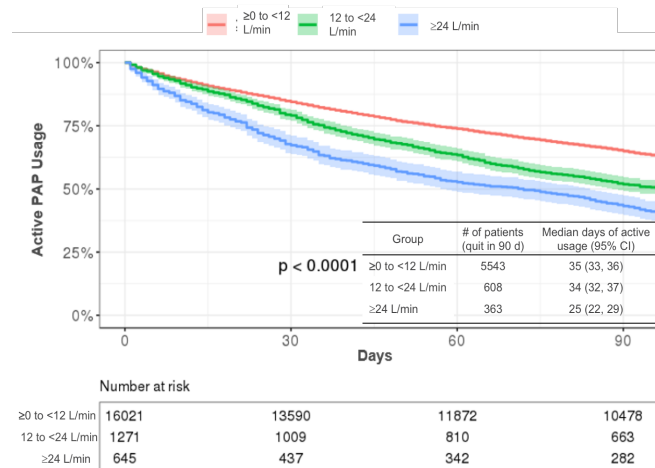

Supplement: NIHMS1657773-supplement-supplement.pdf [file NIHMS1657773-supplement-supplement.pdf]
